# Supplementary material for: Preparation of porous composite ion-exchange membranes for desalination application
Source: Royal Society of Chemistry journal article supplement (doi:10.1039/c0jm04142d), 2011-01-01
Supplement: c0jm04142d.pdf [file c0jm04142d.pdf]

## Preparation of porous composite ion-exchange membranes for desalination application

Chalida Klaysom<sup>a</sup>, Roland Marschall<sup>a</sup>, Seung-Hyeon Moon<sup>b</sup>, Bradley P. Ladewig<sup>a,c</sup>, G.Q. Max Lu<sup>\*a</sup>, and Lianzhou Wang<sup>\*a</sup>

### Supporting Information

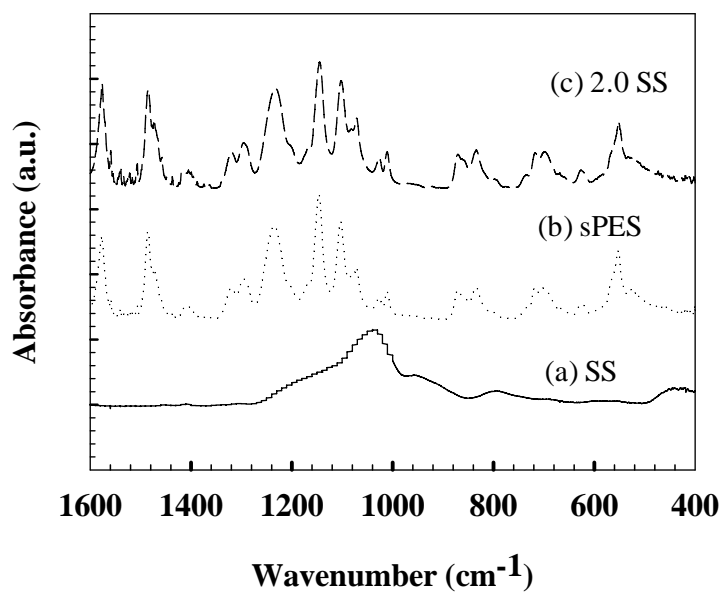

**Fig.S1** Representative IR spectra of (a) inorganic filler, SS, (b) pristine membrane, sPES, and (c) composite membrane with 2 wt% SS.

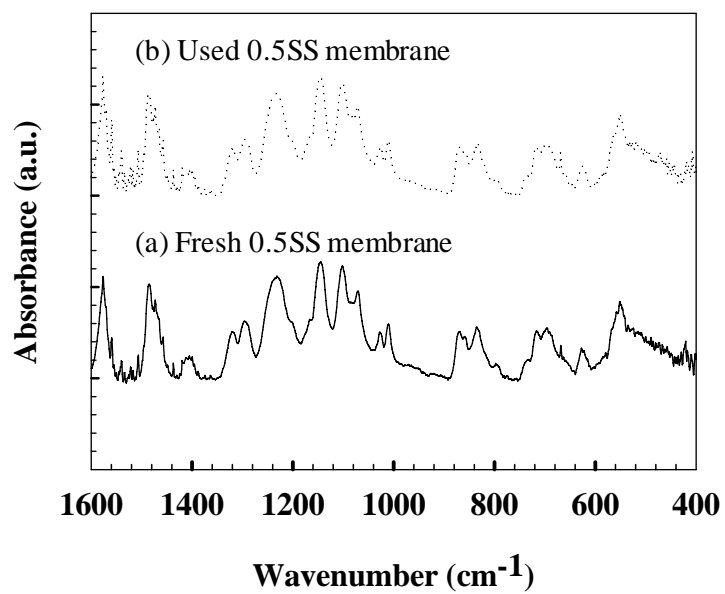

**Fig.S2** IR spectra of (a) fresh and (b) used composite membrane with 0.5 wt% SS.
